# Supplementary material for: Simulation study of ion pairing in concentrated aqueous salt solutions with a polarizable force field
Source: Royal Society of Chemistry journal article supplement (doi:10.1039/c2fd20068f), 2012-05-15
Supplement: c2fd20068f.pdf [file c2fd20068f.pdf]

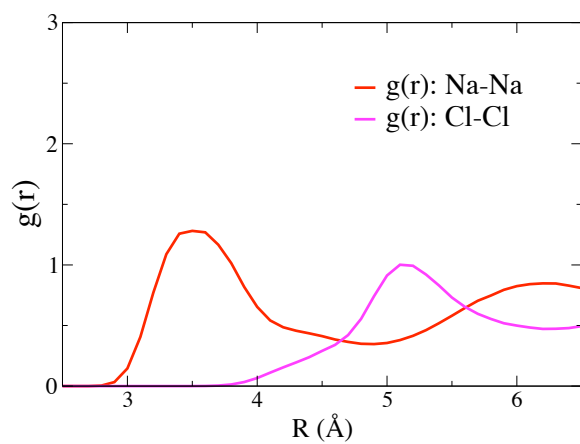

Supplementary Material: Radial distribution of like-charged ion pairs in bulk solution. The red line and magenta lines correspond to the Na-Na and Cl-Cl pairs, respectively.
